# Supplementary material for: Multifunctional protocatechuic acid–polyacrylic acid hydrogel adhesives for wound dressings
Source: Royal Society of Chemistry journal article supplement (doi:10.1039/d4tb00425f), 2024-01-01
Supplement: d4tb00425f1.pdf [file d4tb00425f1.pdf]

## 1 **Experimental Section**

### 2 **Materials**

3 Acrylic acid (AA) was purchased from Aladdin Chemistry Co., Ltd. 2-Hydroxy-1-[4-  
4 (hydroxyethoxy) phenyl]-2-methyl-1-propanone (photoinitiator 2959), potassium persulfate  
5 (KPS), N,N-methylenebis(acrylamide) (MBA), and protocatechuic acid (PCA) were obtained from  
6 Shanghai Energy Chemical Co., Ltd. Polyamidoamine-epichlorohydrin (PAE, 12.5% aqueous  
7 solution, Mw 25000) was provided by Shandong Tiancheng Chemical Co Ltd (China).Co., Ltd.  
8 Deionized water was used in all experiments. All the reagents were used as received unless  
9 otherwise stated.

10

### 11 **Synthesis of PAA-PAE-PCA hydrogel**

12 PAA-PAE-PCA hydrogels were prepared by a simple one-pot method. AA was mixed with 16 ml  
13 deionized water at 20% (w/v) of AA. The photoinitiator 2959, thermal initiator KPS and cross-  
14 linker MBA were added to the AA solution and stirred for 3 mins, followed by the addition of PCA.  
15 The mass ratios of AA to PCA were 1:0.02, 1:0.06, and 1:0.10, respectively. Then, PAE was added  
16 and the mass ratio of PAE to PCA was fixed at 1:1.25. The solution was then injected into a reaction  
17 cell, which consisted of two pieces of glass separated by a 2 mm silica spacer, and  
18 photopolymerized under 365 nm UV light for 1.5 h. Thereafter, the prepared hydrogels were heated  
19 at 75 °C for 5 h. Finally, the gels were washed with water for 2 hours with solution exchanged  
20 every 30 minutes to remove unreacted monomers or PCA. The samples were named 2%, 6%, and  
21 10% PCA according to the mass ratio of PCA to AA. PAA and PAA-PAE hydrogels were prepared  
22 using the same procedure without the addition of PCA/PAE and PCA.

23

### 24 **General characterization**

25 The chemical structure of the hydrogels was determined by attenuated total reflectance Fourier  
26 transform infrared spectroscopy (ATR-FTIR, Thermo iS10) with a resolution of 4 cm<sup>-1</sup> in the range  
27 of 400–4000 cm<sup>-1</sup> at room temperature.

28

### 29 **Rheological measurements**

30 Viscosity measurements were carried out on Thermo HAAKE MARS 60 rheometer using a cone-  
31 and-plate-geometry, with a cone angle of  $2^\circ$  and a diameter of 35 mm for high viscosity liquids  
32 (viscosity  $\geq 50$  mPa·s), and module with a double-slit rotor and a dual slit cylinder with a diameter  
33 of 27 mm for low viscosity liquid phase (viscosity  $< 50$  mPa·s).

34

### 35 **Swelling behavior**

36 The swelling ratio of hydrogels was tested using a 14 mm sample disk. The sample was immersed  
37 in 50 mL of water at  $25^\circ\text{C}$ , and the sample weights before ( $w_0$ ) and after ( $w_n$ ) immersion were used  
38 to calculate the swelling ratio ( $\text{SR} = (w_n - w_0) / w_0$ ).

39

### 40 **Mechanical measurements**

41 The mechanical properties of hydrogels were carried out on an electronic universal testing machine  
42 (Suns) equipped with a 50 N tension sensor. All tests were carried out at room temperature ( $25^\circ\text{C}$ ,  
43 60% RH). Measurements were repeated three times and were averaged for a given sample. The  
44 tensile tests of hydrogels were performed with rectangular samples with a size of  $50\text{ mm} \times 10\text{ mm}$   
45  $\times 2\text{ mm}$ . The tensile strength and elongation at break were obtained at  $10\text{ mm min}^{-1}$ . The  
46 compression tests of hydrogels were performed with cylindrical samples with a height of 10 mm  
47 and a diameter of 15 mm. They were compressed to 70% strain at a speed of  $5\text{ mm min}^{-1}$ .

48

### 49 **Adhesion measurement**

50 To evaluate the adhesion ability of hydrogels, lap shear test, 90-degree peeling test, and 180-degree  
51 peeling test were used. An electronic universal testing machine (Suns) equipped with a 50 N tension  
52 sensor was used. For the lap shear test, the hydrogel was sandwiched with a size of  $15\text{ (w)} \times 15\text{ (l)}$   
53  $\text{mm}^2$  between two glass slides, followed by an immediate test (10 seconds contact). The adhesion  
54 strength of hydrogel to porcine skin was measured by the same procedure. The adhesive shear  
55 strength was determined by dividing the max force by the contact area of the sample. The interfacial  
56 toughness was obtained by 90-degree and 180-degree peeling tests. For 90-degree peeling test, the  
57 hydrogel was cut into a size of  $50\text{ mm} \times 10\text{ mm} \times 2\text{ mm}$ , and was initially glued to a non-woven  
58 fabric to minimize its elongation along the peeling direction. Then, the hydrogel was attached to  
59 the surface of glass or porcine skin with a weight of 100 g for 10 seconds before peeling tests. The

60 interfacial toughness was calculated by dividing the max force by the width of the sample. For 180-  
61 degree peeling test, the hydrogel was cut into a size of 50 mm × 10 mm × 2 mm, sandwiched  
62 between two pieces of porcine skin, and lightly pressed with a 100 g weight for 10 seconds before  
63 peeling tests. The interfacial toughness was determined by dividing two times of the max force by  
64 the width of the sample. All tests were conducted with a constant peeling speed of 50 mm min<sup>-1</sup>.

65

## 66 **Evaluation of antioxidant, antibacterial, and anti-UV properties**

67 The antioxidant ability of hydrogels was evaluated via DPPH (nitrogen-free radicals) and PTIO  
68 (oxygen-free radicals) radical scavenging assay. First, the standard curves of DPPH ethanol  
69 solution and PTIO aqueous solution were measured with UV–vis spectrometer (Thermo Scientific).  
70 For the DPPH assay, 500 mg hydrogels were added into 30 mL of DPPH ethanol solution (59 µg  
71 mL<sup>-1</sup>). After incubating for 30 mins, 60 mins and 90 mins, the absorbance at 517 nm of supernatants  
72 was detected. Similarly, for the PTIO assay, 30 mL PTIO aqueous solution (200 µg mL<sup>-1</sup>) was  
73 prepared, and 500 mg hydrogel and PCA (12 mg mL<sup>-1</sup>) were added into different tubes for 6 hours  
74 at 37 °C. The absorbance at 560 nm of supernatant was detected.

75

76 The antibacterial performance of the hydrogels was evaluated by the bacteriostatic circle method  
77 using *Staphylococcus aureus* (ATCC29213) as the model. Pure PAA hydrogels were used as  
78 controls. The hydrogels (10 mm in diameter and 2 mm in thickness) were sterilized after 30 minutes  
79 of irradiation under UV light. Subsequently, 100 µL of bacterial suspension (10<sup>6</sup> CFU mL<sup>-1</sup>) was  
80 evenly spread on Luria-Bertani solid medium, and the hydrogels were placed on the surface of the  
81 medium with sterile forceps and pressed gently to make complete contact between the hydrogels  
82 and the medium, which were incubated at 37 °C for 24 hours. After the incubation, the samples  
83 were photographed, and the bacteriostatic circle size was measured. Each test group was repeated  
84 three times to obtain the average result.

85

86 To evaluate the anti-UV ability of hydrogels, hydrogels with 2 mm thickness were prepared. The  
87 UV–vis transmission spectra of hydrogels with different PCA content were measured using a UV–  
88 vis spectrometer (Thermo Scientific).

89

90 ***In vitro* cytotoxicity test**

91 The hydrogels were immersed in 5.0 mL culture medium, which were placed at 37 °C for 24 hours  
92 to obtain the extract of the hydrogel and were sterilized under UV radiation at the same time. The  
93 extracts were diluted with culture medium and a series of extract dilutions (100.0, 50.0, 25.0, 12.5  
94 mg mL<sup>-1</sup>) were collected to evaluate the cytotoxicity using L929 cells with a Cell Counting Kit-8  
95 (CCK-8) at 24 and 48 hours. The group with normal culture medium was used as the control group.  
96 The absorbance value (OD) at 450 nm was measured by microcoder. Survival rate (SR%) of cells  
97 was calculated using following Eq,  $SR\% = (OD_b - OD_{blank}) / (OD_0 - OD_{blank}) \times 100\%$ , where OD<sub>0</sub> is the  
98 OD450 of the control and OD<sub>b</sub> is the OD450 of experimental groups.

99

100 ***In vivo* wound healing evaluation**

101 The *in vivo* wound healing performance of the hydrogels was investigated using a mouse full-  
102 thickness skin defect model. Six-week-old male Kunming mice were randomly divided into three  
103 groups, including 3M Tegaderm group, suture group and 6% PCA hydrogel group. Mice were  
104 anesthetized by isoflurane inhalation and a full-thickness wound of 10 mm in length was created  
105 on their shaved back. Wound repairment was evaluated by monitoring the wound area on day 3, 6,  
106 and 12. Hematoxylin-Eosin (H&E) staining was carried out on day 3, 6, and 12 to detect the  
107 inflammation. Masson staining was carried out on day 12 to evaluate collagen fibers regenerated  
108 during wound healing.

109

110 ***In vivo* Biosafety evaluation**

111 Important organs and tissues in the 6% PCA hydrogel group, including liver, lung, heart, kidney,  
112 spleen and mussle were collected on day 12 to detecte the inflammation and damage alterations.  
113 They were fixed in 10% formalin, processed and embedded in paraffin. Organ sections were stained  
114 with H&E for biosafety evaluation.

115

116

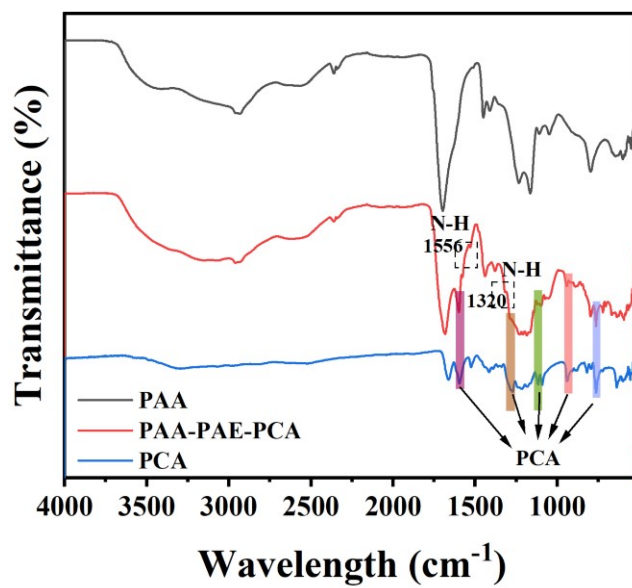

117

118 **Figure S1.** FTIR spectrum of PAA, PCA and PAA-PAE-PCA.

119

A

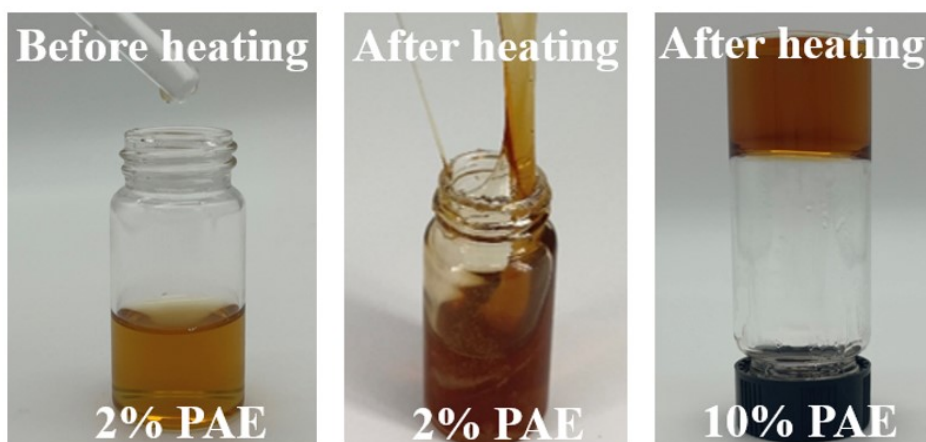

B

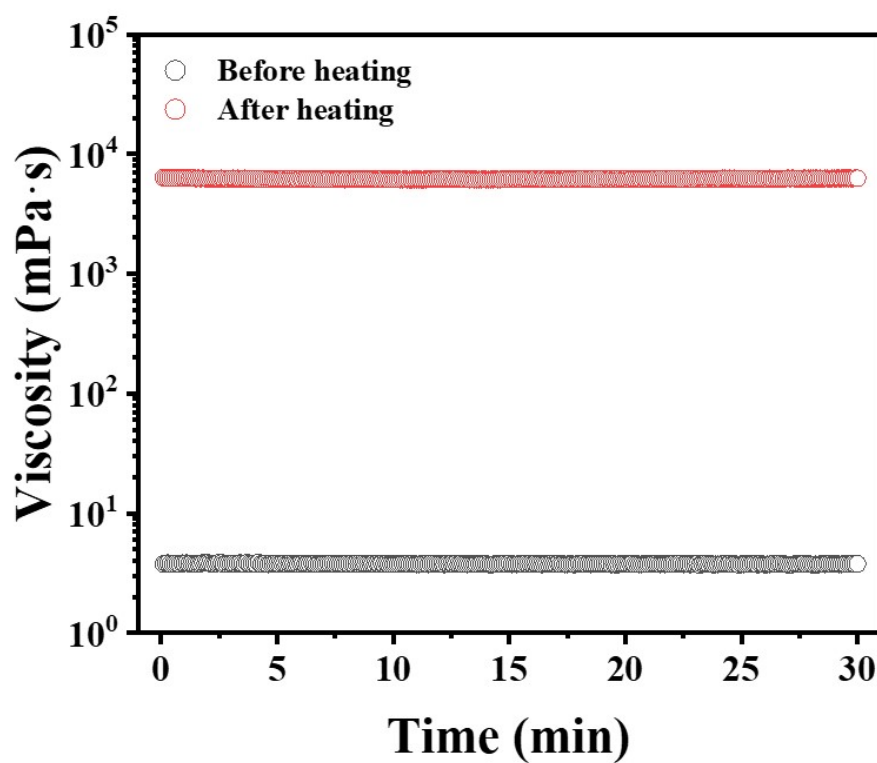

120

121 **Figure S2.** A) Photographs of polymer solution without MBA before and after heat treatment. B)

122 Viscosity of solution containing 2% PAE before and after heat treatment.

123

124

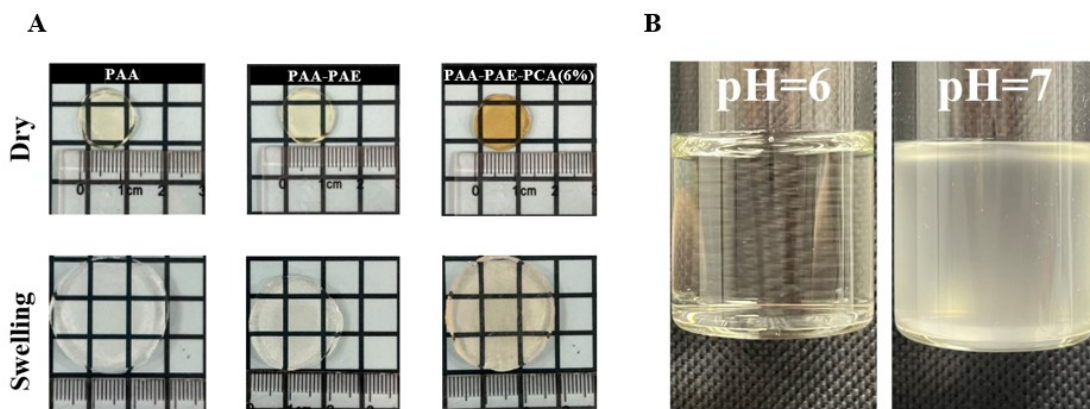

125

126 **Figure S3.** A) Photographs of dry hydrogels and hydrogels swelled in water for ~48 hours. **B)**

127 Photographs of PAE aqueous solution (6.25 wt%) at different pH. Under neutral pH, the solution

128 became turbid, indicating the relative hydrophobicity of PAE backbone.

129

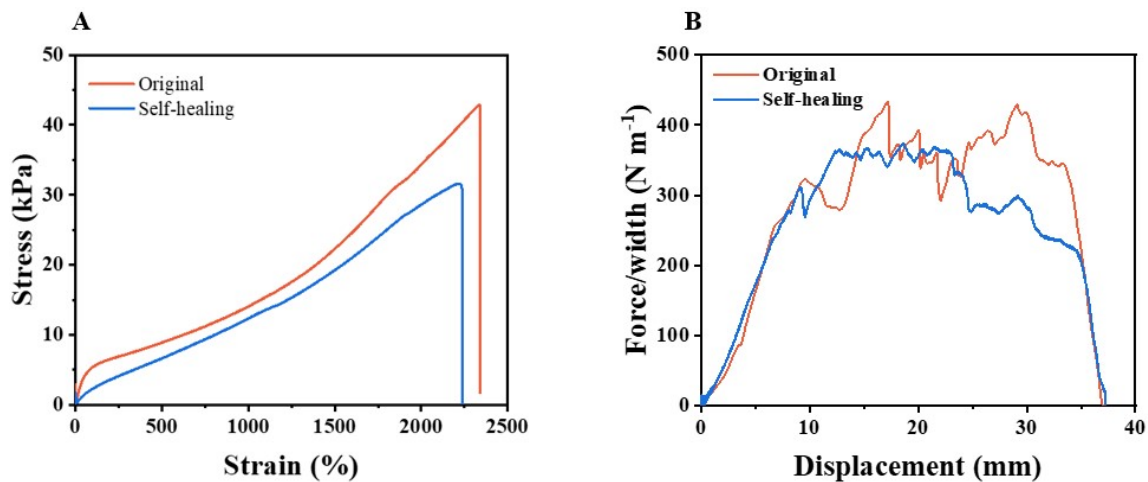

130

131 **Figure S4. A)** Tensile test of self-healed hydrogel (water content was  $\sim 47\%$ ). **B)** 90 degree peeling

132 test of self-healed hydrogel on porcine skin (water content was  $\sim 30\%$ ).



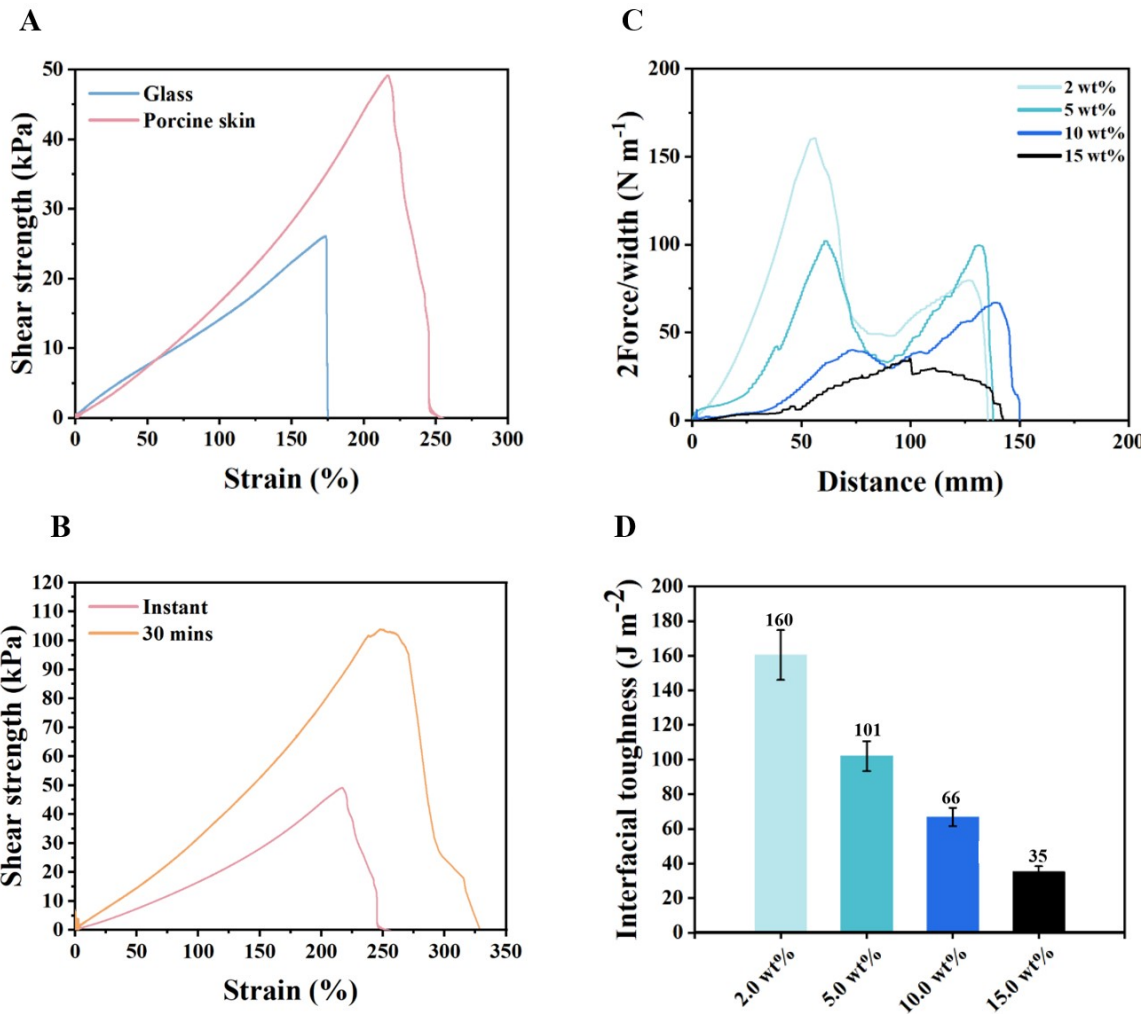

133 **Figure S5.** **A)** Shear strength of the hydrogel containing 6% PCA on glass and porcine skin. **B)**  
 134 Shear strength of the hydrogel containing 6% PCA on porcine skin after different contact time. **C,**  
 135 **D)** The 180-degree peeling test and interfacial toughness of hydrogels on porcine skin after soaking  
 136 in different concentration of NaCl solution.

137

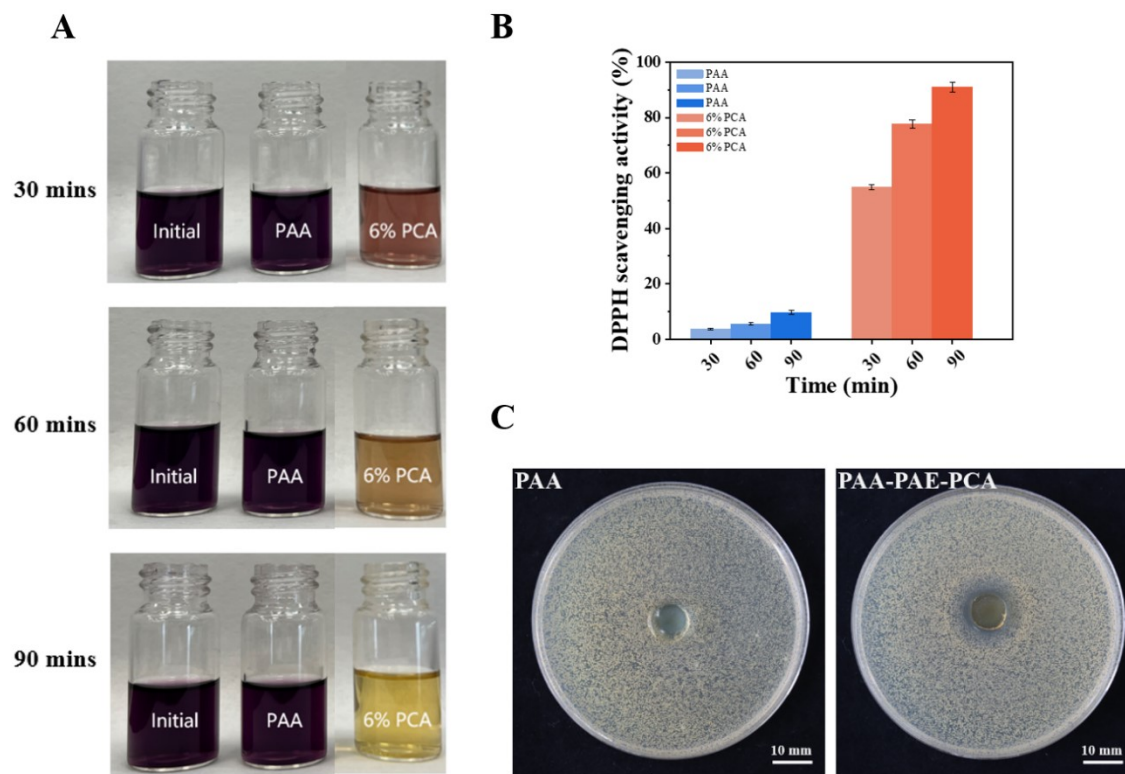

138 **Figure S6.** A) Photographs of DPPH solution treated by different samples at the specified time.

139 B) DPPH scavenging activity of PAA and 6% PCA hydrogels after different contact time. C)

140 Photographs of bacteriostatic circle.
